# Supplementary material for: CRISPR-Cas9 mediated efficient PD-1 disruption on human primary T cells from cancer patients
Source: PubMed Central journal article supplement (PMC4730182; doi:10.1038/srep20070), 2016-01-28
Supplement: srep20070-s1.pdf [file srep20070-s1.pdf]

## CRISPR-Cas9 mediated efficient PD-1 disruption on human primary T cells from cancer patients

Shu Su<sup>1,5</sup>, Bian Hu<sup>2,5</sup>, Jie Shao<sup>1</sup>, Bin Shen<sup>3</sup>, Juan Du<sup>1</sup>, Yinan Du<sup>2</sup>, Jiankui Zhou<sup>2</sup>, Lixia Yu<sup>1</sup>, Lianru Zhang<sup>1</sup>, Fangjun Chen<sup>1</sup>, Huizi Sha<sup>1</sup>, Lei Cheng<sup>1</sup>, Fanyan Meng<sup>1</sup>, Zhengyun Zou<sup>1</sup>, Xingxu Huang<sup>2,4\*</sup>, Baorui Liu<sup>1\*</sup>

<sup>1</sup>The Comprehensive Cancer Centre of Drum Tower Hospital, Medical School of Nanjing University & Clinical Cancer Institute of Nanjing University, Nanjing 210008, China

<sup>2</sup>MOE Key Laboratory of Model Animal for Disease Study, Model Animal Research Center of Nanjing University, National Resource Center for Mutant Mice, Nanjing 210061, China

<sup>3</sup>State Key Laboratory of Reproductive Medicine, Department of Histology and Embryology, Nanjing Medical University, Nanjing 210029, China

<sup>4</sup>School of Life Science and Technology, ShanghaiTech University, 100 Haike Rd., Pudong New Area, Shanghai 201210, China

<sup>5</sup>These authors contributed equally to this work.

\*Correspondence: baorui Liu@nju.edu.cn; huangxx@shanghaitech.edu.cn

### Supplementary Table 1 Oligonucleotides for generating sgRNA expression vectors

| Primers No. | Primer Sequences (5' to 3') |
|-------------|-----------------------------|
| hPD1sg1up   | ACCGCGTGA CTTCACATGAGCG     |
| hPD1sg1down | AAACCGCTCATGTGGAAGTCACG     |
| hPD1sg2for  | ACCGCAGTTGTGTGACACGGAAG     |
| hPD1sg2down | AAACCTTCCGTGT CACACA ACTG   |
| hPD1sg3for  | ACCGACAGCGGCACCTACCTCTG     |
| hPD1sg3down | AAACCAGAGGTAGGTGCCGCTGT     |
| hPD1sg4for  | ACCGGGCCCTGACCACGCTCATG     |
| hPD1sg4down | AAACCATGAGCGTGGTCAGGGCC     |

**Supplementary Table 2** Sequences of primers for dual sgRNA plasmids produce

| Primers No. | Primer Sequences (5' to 3')                              |
|-------------|----------------------------------------------------------|
| hPD1-Psg1   | ATGCGTCTCAACCGCGTGACTTCCACATGAGCGGTTTTAGAGCTAGAAATAGCAAG |
| hPD1-Psg2   | ATGCGTCTCGAAACCTTCCGTGTACACAACCTGCGGTGTTTCGTCTTCCACAAG   |
| hPD1-Psg3   | ATGCGTCTCAACCGACAGCGGCACCTACCTCTGGTTTTAGAGCTAGAAATAGCAAG |
| hPD1-Psg4   | ATGCGTCTCGAAACCATGAGCGTGGTCAGGGCCCGGTGTTTCGTCTTCCACAAG   |

**Supplementary Table 3** Sequences of primers for PCR amplification of targeting sites

| Primers No. | Primer Sequences (5' to 3') | Amplicon (bp) |
|-------------|-----------------------------|---------------|
| hPD1testF   | GGACAACGCCACCTTCACCTGC      | 390           |
| hPD1testR   | CTACGACCTGGAGCTCCTGAT       |               |

**Supplementle Figure 1** Sequences of modified hPD-1 loci detected in the HeLa cellssequencing

```

hPD1
sg1  TGTCACACAACCTGCCAACGGCGTGACTTCCACATGAGCGTGGTCAGGGCCCGGGCAATGAC (WT)
      TGTCACACAACCTGCCAACGGCGGTGACTTCCACAT : AGCGTGGTCAGGGCCCGGGCAATGAC (-1, 1/21)
      TGTCACACAACCTGCCAACGGCGGTGACTTCCACAT : GCGTGGTCAGGGCCCGGGCAATGAC (-2, 2/21)
      TGTCACACAACCTGCCAACGGCGGTGACTTCCACA : GCGTGGTCAGGGCCCGGGCAATGAC (-3, 1/21)
      TGTCACACAACCTGCCAACGGCGGTGACTTCCAC : GCGTGGTCAGGGCCCGGGCAATGAC (-4, 1/21)
      TGTCACACAACCTGCCAACGGCGGTGACTTCCAC : GCGTGGTCAGGGCCCGGGCAATGAC (-8, 1/21)
      TGTCACACAACCTGCCAACGGCGG : TGAGCGTGGTCAGGGCCCGGGCAATGAC (-11, 1/21)
      TGTCACACAACCTGCCAACGGCGGTGACTTCCACATGAGCGTGGTCAGGGCCCGGGCAATGAC (+1, 6/21)
      a
sg2  CAGCCCGGCCAGGACTGCCGCTTCCGTGTGCACACAACCTGCCAACGGCGGTGACTTCCACATGA (WT)
      CAGCCCGGCCAGGACTGCCGCT : GTCACACAACCTGCCAACGGCGGTGACTTCCACATGA (-5, 1/19)
      CAGCCCGGCCAGGACTGCCGC : GTCACACAACCTGCCAACGGCGGTGACTTCCACATGA (-6, 1/19)
      CAGCCCGGCCAGGACTGCCGCTT : ACAACTGCCAACGGCGGTGACTTCCACATGA (-9, 1/19)
      CAGCCCGGCC : CCGTGTGCACACAACCTGCCAACGGCGGTGACTTCCACATGA (-13, 1/19)
      CAGCCCGGC : CGTGTGCACACAACCTGCCAACGGCGGTGACTTCCACATGA (-15, 1/19)
      CAGC : ACACAACCTGCCAACGGCGGTGACTTCCACATGA (-26, 1/19)
      CAGCCCGGCCAGGA : CGGCGGTGACTTCCACATGA (-30, 1/19)
      CAGCCCGGCCAGGACTGCCGCTTCCGTGTGCACACAACCTGCCAACGGCGGTGACTTCCACATGA (+1, 3/19)
      c
      CAGCCCGGCCAGGACTGCCGCTTCCGTGTGCACACAACCTGCCAACGGCGGTGACTTCCACATGA (+51, 2/19)
      bcagaaagctgcagggtttgtccataggtatacgtgtgcatggtggtttgc
sg1+2 CTGCGCCTTCCGTGTGCACACAACCTGCCAACGGCGGTGACTTCCACATGAGCGTGGTCAGGGCC (WT)
      CTGCCGCTTC : AGCGTGGTCAGGGCC (-39, 1/21)
      CTGC : GCGTGGTCAGGGCC (-46, +1, 1/21)
      CTGCCGCTT : AGCGTGGTCAGGGCC (-40, +1, 2/21)
      CTGCCGCTT : gAGCGTGGTCAGGGCC (-40, +2, 1/21)
      : CGTGTGCACACAACCTGCCAACGGCGGTGACTTCCACATGA : AGCGTGGTCAGGGCC (-22, -9, 1/21)
      CTGCCGC : CGTGTGCACACAACCTGCCAACGGCGGTGACTTCCACATGA : GTGGTCAGGGCC (-3, -2, +1, 1/21)
      CTGCC : GTGTGCACACAACCTGCCAACGGCGGTGACTTCCACATG : tggg AGGGCC (-6, -9, +4, 1/21)
      CTGCC : GTGTGCACACAACCTGCCAACGGCGGTGACTTCCAC : GCGTGGTCAGGGCC (-6, -4, +1, 1/21)
      : acccggg : CGGCGGTGACTTCCACATGAGCGTGGTCAGGGCC (-25, +7, +1, 1/21)
      a

```

The PAM sequences are underlined and highlighted in green; the targeting sequences in red; the mutations in blue, lower case; deletions (-), insertions (+). N/N indicates positive colonies out of total sequenced.

**Supplemente Figure 2** The enhanced IFN-gamma production by the Cas9-mediated disruption of PD-1 in primary T cells of cancer patients stimulated by tumor associated antigens

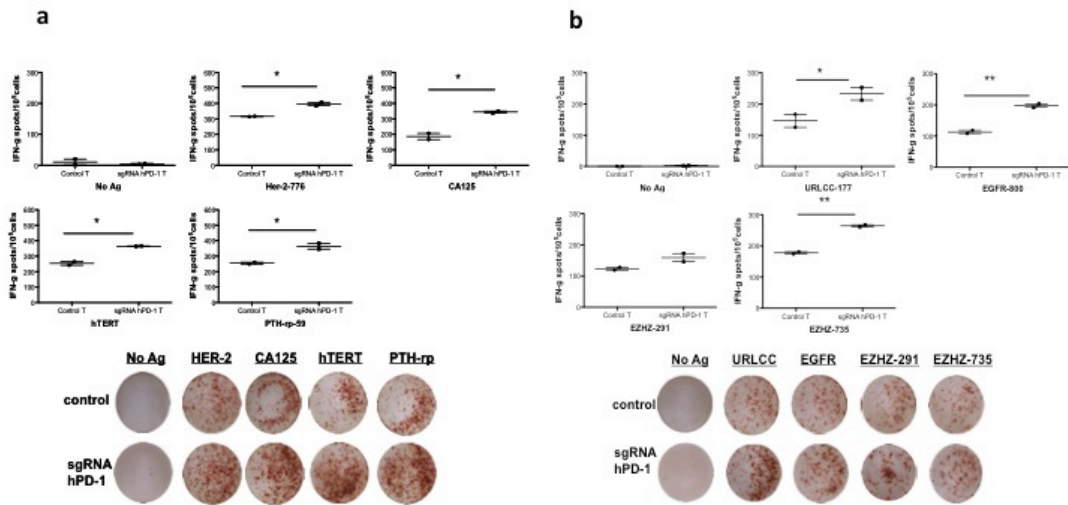

sgRNA hPD-1:Cas9 modified primary T cells and control T cells from cancer patients were cultured in IL-2 after electroporation for 7 d and stimulated by peptides pulsed autologous DCs for 20 h. The IFN- $\gamma$  secreting cells was evaluated by Elispot. All values shown are mean  $\pm$  SD of triplicate or duplicate measurements and have been repeated 3 times with similar results. \* $p < 0.05$ ; \*\* $p < 0.005$ .
